# Supplementary material for: Monocytes Reprogrammed by 4-PBA Potently Contribute to the Resolution of Inflammation and Atherosclerosis
Source: PubMed Central journal article supplement — Circ Res. 2024 Sep 3;135(8):856–72. doi: 10.1161/CIRCRESAHA.124.325023 (PMC11424066; doi:10.1161/circresaha.124.325023), 2024-09-03
Supplement: res-135-856-s006.pdf [file res-135-856-s006.pdf]

## Major Resources Table

In order to allow validation and replication of experiments, all essential research materials listed in the Methods should be included in the Major Resources Table below. Authors are encouraged to use public repositories for protocols, data, code, and other materials and provide persistent identifiers and/or links to repositories when available. Authors may add or delete rows as needed.

### Animals (in vivo studies)

| Species | Vendor or Source   | Background Strain | Sex  | Persistent ID / URL                                                               |
|---------|--------------------|-------------------|------|-----------------------------------------------------------------------------------|
| Mouse   | Jackson Laboratory | C57BL/6           | Male | <a href="https://www.jax.org/strain/000664">https://www.jax.org/strain/000664</a> |
|         |                    |                   |      |                                                                                   |
|         |                    |                   |      |                                                                                   |

### Genetically Modified Animals

|                 | Species | Vendor or Source                                                      | Background Strain | Other Information            | Persistent ID / URL                                                               |
|-----------------|---------|-----------------------------------------------------------------------|-------------------|------------------------------|-----------------------------------------------------------------------------------|
| Parent - Male   | Mouse   | Jackson Laboratory                                                    | C57BL/6           | <i>ApoE</i> <sup>-/-</sup>   | <a href="https://www.jax.org/strain/002052">https://www.jax.org/strain/002052</a> |
| Parent - Female | Mouse   | Jackson Laboratory                                                    | C57BL/6           | <i>ApoE</i> <sup>-/-</sup>   | <a href="https://www.jax.org/strain/002052">https://www.jax.org/strain/002052</a> |
| Parent - Male   | Mouse   | Dr. Holger Eltzschig, University of Texas Houston Medical School, USA | C57BL/6           | <i>Tram</i> <sup>-/-</sup>   |                                                                                   |
| Parent - Female | Mouse   | Dr. Holger Eltzschig, University of Texas Houston Medical School, USA | C57BL/6           | <i>Tram</i> <sup>-/-</sup>   |                                                                                   |
| Parent - Male   | Mouse   | Dr. Jürg Tschopp, University of Lausanne, Switzerland                 | C57BL/6           | <i>Tollip</i> <sup>-/-</sup> |                                                                                   |
| Parent - Female | Mouse   | Dr. Jürg Tschopp, University of Lausanne, Switzerland                 | C57BL/6           | <i>Tollip</i> <sup>-/-</sup> |                                                                                   |
| Parent - Male   | Mouse   | Dr. Yang Liu, University of Maryland, USA                             | C57BL/6           | <i>Cd24</i> <sup>-/-</sup>   |                                                                                   |
| Parent - Female | Mouse   | Dr. Yang Liu, University of Maryland, USA                             | C57BL/6           | <i>Cd24</i> <sup>-/-</sup>   |                                                                                   |

### Antibodies

| Target antigen | Vendor or Source | Catalog # | Working concentration | Lot # (preferred but not required) | Persistent ID / URL                                                                                                                                                                                                                                                                                                                                                                       |
|----------------|------------------|-----------|-----------------------|------------------------------------|-------------------------------------------------------------------------------------------------------------------------------------------------------------------------------------------------------------------------------------------------------------------------------------------------------------------------------------------------------------------------------------------|
| CD16/CD32      | BD Biosciences   | 553141    | 1:100                 |                                    | <a href="https://wwwbdbiosciences.com/en-us/products/reagents/flow-cytometry-reagents/research-reagents/single-color-antibodies-ruo/purified-rat-anti-mouse-cd16-cd32-mouse-bd-fc-block.553141">https://wwwbdbiosciences.com/en-us/products/reagents/flow-cytometry-reagents/research-reagents/single-color-antibodies-ruo/purified-rat-anti-mouse-cd16-cd32-mouse-bd-fc-block.553141</a> |
| CD11b          | BioLegend        | 101226    | 1:200                 |                                    | <a href="https://www.biolegend.com/en-us/products/apc-cyanine7-anti-mouse-human-cd11b-antibody-3930">https://www.biolegend.com/en-us/products/apc-cyanine7-anti-mouse-human-cd11b-antibody-3930</a>                                                                                                                                                                                       |

|        |           |        |       |  |                                                                                                                                                                                                                 |
|--------|-----------|--------|-------|--|-----------------------------------------------------------------------------------------------------------------------------------------------------------------------------------------------------------------|
| CD11b  | BioLegend | 101212 | 1:200 |  | <a href="https://www.biolegend.com/en-us/products/apc-anti-mouse-human-cd11b-antibody-345">https://www.biolegend.com/en-us/products/apc-anti-mouse-human-cd11b-antibody-345</a>                                 |
| CD11b  | BioLegend | 101208 | 1:200 |  | <a href="https://www.biolegend.com/en-us/products/pe-anti-mouse-human-cd11b-antibody-349">https://www.biolegend.com/en-us/products/pe-anti-mouse-human-cd11b-antibody-349</a>                                   |
| Ly6C   | BioLegend | 128018 | 1:200 |  | <a href="https://www.biolegend.com/en-us/products/pe-cyanine7-anti-mouse-ly-6c-antibody-6063">https://www.biolegend.com/en-us/products/pe-cyanine7-anti-mouse-ly-6c-antibody-6063</a>                           |
| Ly6C   | BioLegend | 128026 | 1:200 |  | <a href="https://www.biolegend.com/en-us/products/apc-cyanine7-anti-mouse-ly-6c-antibody-6758">https://www.biolegend.com/en-us/products/apc-cyanine7-anti-mouse-ly-6c-antibody-6758</a>                         |
| Ly6C   | BioLegend | 128016 | 1:200 |  | <a href="https://www.biolegend.com/en-us/products/apc-anti-mouse-ly-6c-antibody-6047">https://www.biolegend.com/en-us/products/apc-anti-mouse-ly-6c-antibody-6047</a>                                           |
| Ly6G   | BioLegend | 127616 | 1:200 |  | <a href="https://www.biolegend.com/en-us/products/percp-cyanine5-5-anti-mouse-ly-6g-antibody-6116">https://www.biolegend.com/en-us/products/percp-cyanine5-5-anti-mouse-ly-6g-antibody-6116</a>                 |
| Ly6G   | BioLegend | 127608 | 1:200 |  | <a href="https://www.biolegend.com/en-us/products/pe-anti-mouse-ly-6g-antibody-4777">https://www.biolegend.com/en-us/products/pe-anti-mouse-ly-6g-antibody-4777</a>                                             |
| Ly6G   | BioLegend | 127624 | 1:200 |  | <a href="https://www.biolegend.com/en-us/products/apc-cyanine7-anti-mouse-ly-6g-antibody-6755">https://www.biolegend.com/en-us/products/apc-cyanine7-anti-mouse-ly-6g-antibody-6755</a>                         |
| ICAM-1 | BioLegend | 116120 | 1:200 |  | <a href="https://www.biolegend.com/en-us/products/apc-anti-mouse-cd54-antibody-6673">https://www.biolegend.com/en-us/products/apc-anti-mouse-cd54-antibody-6673</a>                                             |
| ICAM-1 | BioLegend | 116108 | 1:200 |  | <a href="https://www.biolegend.com/en-us/products/pe-anti-mouse-cd54-antibody-1680">https://www.biolegend.com/en-us/products/pe-anti-mouse-cd54-antibody-1680</a>                                               |
| CD24   | BioLegend | 101806 | 1:200 |  | <a href="https://www.biolegend.com/en-us/products/fitc-anti-mouse-cd24-antibody-341">https://www.biolegend.com/en-us/products/fitc-anti-mouse-cd24-antibody-341</a>                                             |
| CD24   | BioLegend | 101808 | 1:200 |  | <a href="https://www.biolegend.com/en-us/products/pe-anti-mouse-cd24-antibody-343">https://www.biolegend.com/en-us/products/pe-anti-mouse-cd24-antibody-343</a>                                                 |
| c-kit  | BioLegend | 105806 | 1:200 |  | <a href="https://www.biolegend.com/en-us/products/fitc-anti-mouse-cd117-c-kit-antibody-74">https://www.biolegend.com/en-us/products/fitc-anti-mouse-cd117-c-kit-antibody-74</a>                                 |
| CD93   | BioLegend | 136509 | 1:200 |  | <a href="https://www.biolegend.com/en-us/products/apc-anti-mouse-cd93-aa4-1-early-b-lineage-antibody-6621">https://www.biolegend.com/en-us/products/apc-anti-mouse-cd93-aa4-1-early-b-lineage-antibody-6621</a> |
| CD105  | BioLegend | 120413 | 1:200 |  | <a href="https://www.biolegend.com/en-us/products/apc-anti-mouse-cd105-antibody-6519">https://www.biolegend.com/en-us/products/apc-anti-mouse-cd105-antibody-6519</a>                                           |
| CD11c  | BioLegend | 117310 | 1:200 |  | <a href="https://www.biolegend.com/en-us/products/apc-anti-mouse-cd11c-antibody-1813">https://www.biolegend.com/en-us/products/apc-anti-mouse-cd11c-antibody-1813</a>                                           |
| MHCII  | BioLegend | 107606 | 1:200 |  | <a href="https://www.biolegend.com/en-us/products/fitc-anti-mouse-i-a-i-e-antibody-366">https://www.biolegend.com/en-us/products/fitc-anti-mouse-i-a-i-e-antibody-366</a>                                       |

|            |                           |               |        |  |                                                                                                                                                                                                                                               |
|------------|---------------------------|---------------|--------|--|-----------------------------------------------------------------------------------------------------------------------------------------------------------------------------------------------------------------------------------------------|
| CD200R     | BioLegend                 | 123916        | 1:200  |  | <a href="https://www.biolegend.com/en-us/products/apc-anti-mouse-cd200r-ox2r-antibody-17940">https://www.biolegend.com/en-us/products/apc-anti-mouse-cd200r-ox2r-antibody-17940</a>                                                           |
| CD19       | BioLegend                 | 115520        | 1:200  |  | <a href="https://www.biolegend.com/en-us/products/pe-cyanine7-anti-mouse-cd19-antibody-1907">https://www.biolegend.com/en-us/products/pe-cyanine7-anti-mouse-cd19-antibody-1907</a>                                                           |
| CD3        | BioLegend                 | 100205        | 1:200  |  | <a href="https://www.biolegend.com/en-us/products/pe-anti-mouse-cd3-antibody-47">https://www.biolegend.com/en-us/products/pe-anti-mouse-cd3-antibody-47</a>                                                                                   |
| CD8        | BioLegend                 | 100705        | 1:200  |  | <a href="https://www.biolegend.com/en-us/products/fitc-anti-mouse-cd8a-antibody-153">https://www.biolegend.com/en-us/products/fitc-anti-mouse-cd8a-antibody-153</a>                                                                           |
| CD122      | BioLegend                 | 123214        | 1:200  |  | <a href="https://www.biolegend.com/en-us/products/apc-anti-mouse-cd122-il-2rbeta-antibody-8908">https://www.biolegend.com/en-us/products/apc-anti-mouse-cd122-il-2rbeta-antibody-8908</a>                                                     |
| SYK        | Cell Signaling Technology | 2712S         | 1:1000 |  | <a href="https://www.cellsignal.com/products/primary-antibodies/syk-antibody/2712">https://www.cellsignal.com/products/primary-antibodies/syk-antibody/2712</a>                                                                               |
| p-p38      | Cell Signaling Technology | 4511S         | 1:1000 |  | <a href="https://www.cellsignal.com/products/primary-antibodies/phospho-p38-mapk-thr180-tyr182-d3f9-xp-rabbit-mab/4511">https://www.cellsignal.com/products/primary-antibodies/phospho-p38-mapk-thr180-tyr182-d3f9-xp-rabbit-mab/4511</a>     |
| IRF5       | Cell Signaling Technology | 4950S         | 1:1000 |  | <a href="https://www.cellsignal.com/products/primary-antibodies/irf-5-antibody/4950">https://www.cellsignal.com/products/primary-antibodies/irf-5-antibody/4950</a>                                                                           |
| β-Actin    | Cell Signaling Technology | 5125S         | 1:1000 |  | <a href="https://www.cellsignal.com/products/antibody-conjugates/b-actin-13e5-rabbit-mab-hrp-conjugate/5125">https://www.cellsignal.com/products/antibody-conjugates/b-actin-13e5-rabbit-mab-hrp-conjugate/5125</a>                           |
| Rabbit IgG | Cell Signaling Technology | 7074S         | 1:1000 |  | <a href="https://www.cellsignal.com/products/secondary-antibodies/anti-rabbit-igg-hrp-linked-antibody/7074">https://www.cellsignal.com/products/secondary-antibodies/anti-rabbit-igg-hrp-linked-antibody/7074</a>                             |
| mTOR       | Cell Signaling Technology | 5043S         | 1:200  |  | <a href="https://www.cellsignal.com/products/antibody-conjugates/mTOR-7c10-rabbit-mab-alexa-fluor-174-488-conjugate/5043">https://www.cellsignal.com/products/antibody-conjugates/mTOR-7c10-rabbit-mab-alexa-fluor-174-488-conjugate/5043</a> |
| mTOR       | Proteintech,              | CL594-66888   | 1:300  |  | <a href="https://www.ptglab.com/products/mTOR-Antibody-CL594-66888.htm">https://www.ptglab.com/products/mTOR-Antibody-CL594-66888.htm</a>                                                                                                     |
| SYK        | BioLegend                 | 646004        | 1:500  |  | <a href="https://www.biolegend.com/en-us/products/pe-anti-syk-antibody-11650">https://www.biolegend.com/en-us/products/pe-anti-syk-antibody-11650</a>                                                                                         |
| TRAM       | Biorbyt                   | orb452158     | 1:500  |  | <a href="https://www.biorbyt.com/ticam2-conjugated-antibody-orb1621486.html">https://www.biorbyt.com/ticam2-conjugated-antibody-orb1621486.html</a>                                                                                           |
| Tollip     | NOVUS                     | H00054472-M01 | 20 µg  |  | <a href="https://www.novusbio.com/products/tollip-antibody-1a5-2a3_h00054472-m01">https://www.novusbio.com/products/tollip-antibody-1a5-2a3_h00054472-m01</a>                                                                                 |
| NEDD8      | Thermo Fisher Scientific  | MA5-32552     | 50 µg  |  | <a href="https://www.thermofisher.com/antibody/product/NEDD8-Antibody-clone-JF69-09-Recombinant-Monoclonal/MA5-32552">https://www.thermofisher.com/antibody/product/NEDD8-Antibody-clone-JF69-09-Recombinant-Monoclonal/MA5-32552</a>         |
| PPARγ      | Thermo Fisher Scientific  | PA3-821A      | 1:1000 |  | <a href="https://www.thermofisher.com/antibody/product/PPAR-gamma-Antibody-Polyclonal/PA3-821A">https://www.thermofisher.com/antibody/product/PPAR-gamma-Antibody-Polyclonal/PA3-821A</a>                                                     |
| CD45.1     | BioLegend                 | 110730        | 1:200  |  | <a href="https://www.biolegend.com/en-us/products/pe-cyanine7-anti-mouse-cd45-1-antibody-4917">https://www.biolegend.com/en-us/products/pe-cyanine7-anti-mouse-cd45-1-antibody-4917</a>                                                       |
| CD14       | BioLegend                 | 325618        | 1:50   |  | <a href="https://www.biolegend.com/en-us/products/pe-cyanine7-anti-human-cd14-antibody-3958">https://www.biolegend.com/en-us/products/pe-cyanine7-anti-human-cd14-antibody-3958</a>                                                           |

|        |           |        |      |  |                                                                                                                                                                                               |
|--------|-----------|--------|------|--|-----------------------------------------------------------------------------------------------------------------------------------------------------------------------------------------------|
| CD16   | BioLegend | 360710 | 1:50 |  | <a href="https://www.biolegend.com/en-us/products/apc-cyanine7-anti-human-cd16-antibody-9134">https://www.biolegend.com/en-us/products/apc-cyanine7-anti-human-cd16-antibody-9134</a>         |
| ICAM-1 | BioLegend | 353114 | 1:50 |  | <a href="https://www.biolegend.com/en-us/products/alexa-fluor-647-anti-human-cd54-antibody-14743">https://www.biolegend.com/en-us/products/alexa-fluor-647-anti-human-cd54-antibody-14743</a> |
| CD24   | BioLegend | 311106 | 1:50 |  | <a href="https://www.biolegend.com/en-us/products/pe-anti-human-cd24-antibody-1805">https://www.biolegend.com/en-us/products/pe-anti-human-cd24-antibody-1805</a>                             |

### DNA/cDNA Clones

| Clone Name | Sequence | Source / Repository | Persistent ID / URL |
|------------|----------|---------------------|---------------------|
|            |          |                     |                     |
|            |          |                     |                     |
|            |          |                     |                     |

### Cultured Cells

| Name                                     | Vendor or Source                                                                                                           | Sex (F, M, or unknown) | Persistent ID / URL                                                                             |
|------------------------------------------|----------------------------------------------------------------------------------------------------------------------------|------------------------|-------------------------------------------------------------------------------------------------|
| Mouse bone marrow derived monocytes      | Isolated from C57BL/6, B6 SJL, <i>Tram</i> <sup>-/-</sup> , <i>Tollip</i> <sup>-/-</sup> , <i>Cd24</i> <sup>-/-</sup> mice | female and male        |                                                                                                 |
| Human peripheral blood mononuclear cells | Isolated from peripheral blood of healthy individuals purchased from Research Blood Components, LLC                        | unknown                | <a href="https://www.researchbloodcomponents.com/">https://www.researchbloodcomponents.com/</a> |
|                                          |                                                                                                                            |                        |                                                                                                 |

### Data & Code Availability

| Description                | Source / Repository          | Persistent ID / URL   |
|----------------------------|------------------------------|-----------------------|
| Single cell RNA-seq data   | NCBI Gene Expression Omnibus | accession # GSE160450 |
| Methylation profiling data | NCBI Gene Expression Omnibus | accession # GSE243358 |
|                            |                              |                       |

### Other (key reagents & kits)

| Description               | Source / Repository                                | Catalog # | Persistent ID / URL                                                                                                                                 |
|---------------------------|----------------------------------------------------|-----------|-----------------------------------------------------------------------------------------------------------------------------------------------------|
| Murine M-CSF              | Peprtech                                           | 315-02    | <a href="https://www.peprtech.com/en/recombinant-murine-m-csf">https://www.peprtech.com/en/recombinant-murine-m-csf</a>                             |
| 4-PBA                     | MilliporeSigma                                     | SML0309   | <a href="https://www.sigmaaldrich.com/US/en/product/sigma/sml0309">https://www.sigmaaldrich.com/US/en/product/sigma/sml0309</a>                     |
| oxLDL                     | Kalen Biomedical                                   | 770202    | <a href="https://kalenbiomed.com/products/moxldl">https://kalenbiomed.com/products/moxldl</a>                                                       |
| Cholesterol               | MilliporeSigma                                     | C4951     | <a href="https://www.sigmaaldrich.com/US/en/product/sigma/c4951">https://www.sigmaaldrich.com/US/en/product/sigma/c4951</a>                         |
| Propidium iodide          | MilliporeSigma                                     | P4170     | <a href="https://www.sigmaaldrich.com/US/en/product/sigma/p4170">https://www.sigmaaldrich.com/US/en/product/sigma/p4170</a>                         |
| Murine GM-CSF             | Peprtech                                           | 315-03    | <a href="https://www.peprtech.com/en/recombinant-murine-gm-csf">https://www.peprtech.com/en/recombinant-murine-gm-csf</a>                           |
| AAV8-mPCSK9-D377Y vectors | Center for Cardiovascular Diseases and Sciences of |           | <a href="https://www.lsuhs.edu/centers/cardiovascular-diseases-and-sciences">https://www.lsuhs.edu/centers/cardiovascular-diseases-and-sciences</a> |

|                                            |                            |              |                                                                                                                                                                                                                     |
|--------------------------------------------|----------------------------|--------------|---------------------------------------------------------------------------------------------------------------------------------------------------------------------------------------------------------------------|
|                                            | Louisiana State University |              |                                                                                                                                                                                                                     |
| ACK buffer                                 | Quality Biological         | 118-156-721  | <a href="https://www.qualitybiological.com/product/ack-lysing-buffer-4/">https://www.qualitybiological.com/product/ack-lysing-buffer-4/</a>                                                                         |
| Collagenase, Type 1                        | Worthington                | LS004196     | <a href="https://www.worthington-biochem.com/products/collagenase?v=705">https://www.worthington-biochem.com/products/collagenase?v=705</a>                                                                         |
| Collagenase, Type XI                       | MilliporeSigma             | C7657        | <a href="https://www.sigmaaldrich.com/US/en/product/sigma/c7657">https://www.sigmaaldrich.com/US/en/product/sigma/c7657</a>                                                                                         |
| Hyaluronidase                              | MilliporeSigma             | H6254        | <a href="https://www.sigmaaldrich.com/US/en/product/sigma/h6254">https://www.sigmaaldrich.com/US/en/product/sigma/h6254</a>                                                                                         |
| DNase                                      | MilliporeSigma             | DN25         | <a href="https://www.sigmaaldrich.com/US/en/product/sigma/dn25">https://www.sigmaaldrich.com/US/en/product/sigma/dn25</a>                                                                                           |
| HEPES solution                             | MilliporeSigma             | H0887        | <a href="https://www.sigmaaldrich.com/US/en/product/sigma/h0887">https://www.sigmaaldrich.com/US/en/product/sigma/h0887</a>                                                                                         |
| CFSE                                       | Thermo Fisher Scientific   | C34570       | <a href="https://www.thermofisher.com/order/catalog/product/C34554">https://www.thermofisher.com/order/catalog/product/C34554</a>                                                                                   |
| CellTrace™ Far Red                         | Thermo Fisher Scientific   | C34572       | <a href="https://www.thermofisher.com/order/catalog/product/C34572?SID=srch-hj-c34572">https://www.thermofisher.com/order/catalog/product/C34572?SID=srch-hj-c34572</a>                                             |
| RIPA buffer                                | Thermo Fisher Scientific   | 89900        | <a href="https://www.thermofisher.com/order/catalog/product/89900?SID=srch-srp-89900">https://www.thermofisher.com/order/catalog/product/89900?SID=srch-srp-89900</a>                                               |
| Protease Inhibitor Cocktail                | MilliporeSigma             | P8340        | <a href="https://www.sigmaaldrich.com/US/en/product/sigma/p8340">https://www.sigmaaldrich.com/US/en/product/sigma/p8340</a>                                                                                         |
| Phosphatase Inhibitor Cocktail 2           | MilliporeSigma             | P5726        | <a href="https://www.sigmaaldrich.com/US/en/product/sigma/p5726">https://www.sigmaaldrich.com/US/en/product/sigma/p5726</a>                                                                                         |
| Blotting-Grade Blocker                     | Bio-Rad                    | 1706404      | <a href="https://www.bio-rad.com/en-us/sku/1706404-blotting-grade-blocker?ID=1706404">https://www.bio-rad.com/en-us/sku/1706404-blotting-grade-blocker?ID=1706404</a>                                               |
| ECL Western Blotting Substrate             | Thermo Fisher Scientific   | 32106        | <a href="https://www.thermofisher.com/order/catalog/product/32106?SID=srch-srp-32106">https://www.thermofisher.com/order/catalog/product/32106?SID=srch-srp-32106</a>                                               |
| ProLong™ Gold Antifade Mountant            | Thermo Fisher Scientific   | P36930       | <a href="https://www.thermofisher.com/order/catalog/product/P36930?SID=srch-hj-P36930">https://www.thermofisher.com/order/catalog/product/P36930?SID=srch-hj-P36930</a>                                             |
| Alexa Fluor™ 488 conjugated streptavidin   | Thermo Fisher Scientific   | S32354       | <a href="https://www.thermofisher.com/order/catalog/product/S32354?SID=srch-hj-S32354">https://www.thermofisher.com/order/catalog/product/S32354?SID=srch-hj-S32354</a>                                             |
| Rabbit IgG Isotype Control                 | Thermo Fisher Scientific   | 31235        | <a href="https://www.thermofisher.com/antibody/product/Rabbit-IgG-Polyclonal/31235">https://www.thermofisher.com/antibody/product/Rabbit-IgG-Polyclonal/31235</a>                                                   |
| PE Mouse IgG1 Isotype Control              | BioLegend                  | 400112       | <a href="https://www.biolegend.com/en-us/products/pe-mouse-igg1-kappa-isotype-ctrl-1408">https://www.biolegend.com/en-us/products/pe-mouse-igg1-kappa-isotype-ctrl-1408</a>                                         |
| CoraLite®594 Mouse IgG2a Isotype Control   | Proteintech                | CL594-65208  | <a href="https://www.ptglab.com/products/IgG2a-Isotype-Control-Antibody-CL594-65208.htm">https://www.ptglab.com/products/IgG2a-Isotype-Control-Antibody-CL594-65208.htm</a>                                         |
| Biotin Rabbit IgG Isotype Control          | Abcam                      | ab200208     | <a href="https://www.abcam.com/en-us/products/primary-antibodies/biotin-rabbit-igg-isotype-control-ab200208">https://www.abcam.com/en-us/products/primary-antibodies/biotin-rabbit-igg-isotype-control-ab200208</a> |
| Ficoll®-Paque                              | MilliporeSigma             | GE17-5442-02 | <a href="https://www.sigmaaldrich.com/US/en/product/sigma/ge17544202">https://www.sigmaaldrich.com/US/en/product/sigma/ge17544202</a>                                                                               |
| Human M-CSF                                | Peptotech                  | 300-25       | <a href="https://www.peptotech.com/en/recombinant-human-m-csf">https://www.peptotech.com/en/recombinant-human-m-csf</a>                                                                                             |
| Human TruStain FcX™                        | BioLegend                  | 422302       | <a href="https://www.biolegend.com/en-us/products/human-trustain-fcx-fc-receptor-blocking-solution-6462">https://www.biolegend.com/en-us/products/human-trustain-fcx-fc-receptor-blocking-solution-6462</a>         |
| Cyto-Fast™ Fix/Perm Buffer Set             | BioLegend                  | 426803       | <a href="https://www.biolegend.com/en-us/products/cyto-fast-fix-perm-buffer-set-16765">https://www.biolegend.com/en-us/products/cyto-fast-fix-perm-buffer-set-16765</a>                                             |
| oxLDL Uptake Assay Kit                     | Cayman Chemical            | 601180       | <a href="https://www.caymanchem.com/product/601180/oxidized-ldl-uptake-assay-kit">https://www.caymanchem.com/product/601180/oxidized-ldl-uptake-assay-kit</a>                                                       |
| Fat, Oil Red O, Propylene Glycol Stain Kit | Newcomer Supply            | 9119A        | <a href="https://www.newcomersupply.com/product/fat-oil-red-o-propylene-glycol-stain-kit/">https://www.newcomersupply.com/product/fat-oil-red-o-propylene-glycol-stain-kit/</a>                                     |

|                                                    |                          |                |                                                                                                                                                                                                                                                                                                                                                               |
|----------------------------------------------------|--------------------------|----------------|---------------------------------------------------------------------------------------------------------------------------------------------------------------------------------------------------------------------------------------------------------------------------------------------------------------------------------------------------------------|
| Picosirius Red Stain Kit                           | Polysciences             | 24901          | <a href="https://www.polysciences.com/german/picosirius-red-stain-kit-40771">https://www.polysciences.com/german/picosirius-red-stain-kit-40771</a>                                                                                                                                                                                                           |
| Cholesterol Quantitation Kit                       | MilliporeSigma           | MAK043         | <a href="https://www.sigmaaldrich.com/US/en/product/sigma/mak043">https://www.sigmaaldrich.com/US/en/product/sigma/mak043</a>                                                                                                                                                                                                                                 |
| Triglyceride Assay Kit                             | BioVision                | K622           | <a href="https://www.abcam.com/en-us/products/assay-kits/triglyceride-assay-kit-quantification-ab65336">https://www.abcam.com/en-us/products/assay-kits/triglyceride-assay-kit-quantification-ab65336</a>                                                                                                                                                     |
| SelectFX™ Alexa Fluor™ 488 Peroxisome Labeling Kit | Thermo Fisher Scientific | S34201         | <a href="https://www.thermofisher.com/order/catalog/product/S34201">https://www.thermofisher.com/order/catalog/product/S34201</a>                                                                                                                                                                                                                             |
| Pierce™ Co-Immunoprecipitation Kit                 | Thermo Fisher Scientific | 26149          | <a href="https://www.thermofisher.com/order/catalog/product/26149?SID=srch-srp-26149">https://www.thermofisher.com/order/catalog/product/26149?SID=srch-srp-26149</a>                                                                                                                                                                                         |
| CCL5 ELISA Kit                                     | R&D Systems              | MMR00          | <a href="https://www.rndsystems.com/products/mouse-rat-ccl5-rantes-quantikine-elisa-kit_mmr00">https://www.rndsystems.com/products/mouse-rat-ccl5-rantes-quantikine-elisa-kit_mmr00</a>                                                                                                                                                                       |
| Vybrant™ Cell Adhesion Assay Kit                   | Thermo Fisher Scientific | V13181         | <a href="https://www.thermofisher.com/order/catalog/product/V13181?SID=srch-hj-V13181">https://www.thermofisher.com/order/catalog/product/V13181?SID=srch-hj-V13181</a>                                                                                                                                                                                       |
| In Vivo EdU Flow Cytometry 50 Kit                  | MilliporeSigma           | BCK488-IV-FC-S | <a href="https://www.sigmaaldrich.com/US/en/product/sigma/bck488ivfcs">https://www.sigmaaldrich.com/US/en/product/sigma/bck488ivfcs</a>                                                                                                                                                                                                                       |
| Seahorse XF Cell Mito Stress Test Kit              | Agilent                  | 103015-100     | <a href="https://www.agilent.com/en/product/cell-analysis/real-time-cell-metabolic-analysis/xf-assay-kits-reagents-cell-assay-media/seahorse-xf-cell-mito-stress-test-kit-740885">https://www.agilent.com/en/product/cell-analysis/real-time-cell-metabolic-analysis/xf-assay-kits-reagents-cell-assay-media/seahorse-xf-cell-mito-stress-test-kit-740885</a> |
| DNeasy Blood & Tissue Kits                         | QIAGEN                   | 69504          | <a href="https://www.qiagen.com/us/products/discovery-and-translational-research/dna-rna-purification/dna-purification/genomic-dna/dneasy-blood-and-tissue-kit">https://www.qiagen.com/us/products/discovery-and-translational-research/dna-rna-purification/dna-purification/genomic-dna/dneasy-blood-and-tissue-kit</a>                                     |
| EpiTect Bisulfite Kit                              | QIAGEN                   | 59104          | <a href="https://www.qiagen.com/us/products/discovery-and-translational-research/epigenetics/dna-methylation/bisulfite-conversion-assays/epitect-bisulfite-kits?catno=59104">https://www.qiagen.com/us/products/discovery-and-translational-research/epigenetics/dna-methylation/bisulfite-conversion-assays/epitect-bisulfite-kits?catno=59104</a>           |
| PyroMark PCR Kit                                   | QIAGEN                   | 978705         | <a href="https://www.qiagen.com/us/products/discovery-and-translational-research/pyrosequencing/pyromark-q24-and-advanced?catno=978705">https://www.qiagen.com/us/products/discovery-and-translational-research/pyrosequencing/pyromark-q24-and-advanced?catno=978705</a>                                                                                     |

## ARRIVE GUIDELINES

The ARRIVE guidelines (<https://arriveguidelines.org/>) are a checklist of recommendations to improve the reporting of research involving animals. Key elements of the study design should be included below to better enable readers to scrutinize the research adequately, evaluate its methodological rigor, and reproduce the methods or findings.

### Study Design

| Groups                                                    | Sex    | Age     | Number (prior to experiment) | Number (after termination) | Littermates (Yes/No) | Other description |
|-----------------------------------------------------------|--------|---------|------------------------------|----------------------------|----------------------|-------------------|
| Group 1 (Control) PBS                                     | Male   | 8 weeks | 10                           | 10                         | No                   | Figure 2          |
| Group 2 4-PBA                                             | Male   | 8 weeks | 10                           | 10                         | No                   | Figure 2          |
| Group 1 (Control) PBS-primed monocytes                    | Male   | 8 weeks | 12                           | 12                         | No                   | Figure 7A-D       |
| Group 2 4-PBA-primed monocytes                            | Male   | 8 weeks | 11                           | 11                         | No                   | Figure 7A-D       |
| Group 1 (Control) PBS-primed monocytes                    | Male   | 9 weeks | 3                            | 3                          | No                   | Figure 7E-F       |
| Group 2 4-PBA-primed monocytes                            | Male   | 9 weeks | 4                            | 4                          | No                   | Figure 7E-F       |
| Group 1 PBS-primed WT monocytes                           | Male   | 8 weeks | 10                           | 10                         | No                   | Figure 8          |
| Group 2 4-PBA-primed WT monocytes                         | Male   | 8 weeks | 10                           | 10                         | No                   | Figure 8          |
| Group 3 PBS-primed <i>Cd24</i> <sup>-/-</sup> monocytes   | Male   | 8 weeks | 10                           | 10                         | No                   | Figure 8          |
| Group 4 4-PBA-primed <i>Cd24</i> <sup>-/-</sup> monocytes | Male   | 8 weeks | 10                           | 10                         | No                   | Figure 8          |
| Group 1 (Control) PBS                                     | Male   | 9 weeks | 6                            | 5                          | No                   | Figure S4         |
| Group 2 4-PBA                                             | Male   | 9 weeks | 6                            | 6                          | No                   | Figure S4         |
| Group 1 (Control) PBS                                     | Male   | 8 weeks | 10                           | 10                         | No                   | Figure S5         |
| Group 2 4-PBA                                             | Male   | 8 weeks | 10                           | 10                         | No                   | Figure S5         |
| Group 1 (Control) PBS-primed monocytes                    | Female | 8 weeks | 5                            | 5                          | No                   | Figure S9         |
| Group 2 4-PBA-primed monocytes                            | Female | 8 weeks | 5                            | 5                          | No                   | Figure S9         |

|                                              |      |         |   |   |     |                             |
|----------------------------------------------|------|---------|---|---|-----|-----------------------------|
| Group 1 (Control)<br>PBS-primed<br>monocytes | Male | 9 weeks | 7 | 7 | No  | Figure S10A upper<br>panels |
| Group 2<br>4-PBA-primed<br>monocytes         | Male | 9 weeks | 5 | 5 | No  | Figure S10A upper<br>panels |
| Group 1 (Control)<br>PBS-primed<br>monocytes | Male | 8 weeks | 6 | 6 | No  | Figure S10A lower<br>panels |
| Group 2<br>4-PBA-primed<br>monocytes         | Male | 8 weeks | 5 | 5 | No  | Figure S10A lower<br>panels |
| Group 1 (Control)<br>PBS-primed<br>monocytes | Male | 8 weeks | 4 | 4 | No  | Figure S10B                 |
| Group 2<br>4-PBA-primed<br>monocytes         | Male | 8 weeks | 5 | 5 | No  | Figure S10B                 |
| Group 1 (Control)<br>PBS-primed<br>monocytes | Male | 9 weeks | 5 | 5 | No  | Figure S10C                 |
| Group 2<br>4-PBA-primed<br>monocytes         | Male | 9 weeks | 5 | 5 | No  | Figure S10C                 |
| Group 1 (Control)<br>PBS-primed<br>monocytes | Male | 8 weeks | 5 | 5 | Yes | Figure S11                  |
| Group 2<br>4-PBA-primed<br>monocytes         | Male | 8 weeks | 4 | 4 | Yes | Figure S11                  |

**Sample Size:** Please explain how the sample size was decided Please provide details of any a *prior* sample size calculation, if done.

The sample sizes were determined based on our previous publications and the power analyses performed by others following the principle of 3Rs (Replacement, Reduction, Refinement). We determined that a sample size of at least 5 mice per group was sufficient to achieve 80% power to detect a 50% change in atherosclerotic burden at a significance level of 0.05. For ex vivo measurement of biochemical markers on harvested cells, at least 3 animals were used in each group based on publications cited in the supplemental materials.

#### **Inclusion Criteria**

Genotype, age and sex matched mice were included.

#### **Exclusion Criteria**

Mice that showed health concerns unrelated to the experimental conditions (for example, fight wounds and dermatitis) were excluded.

#### **Randomization**

Mice were randomly assigned to different treatment groups.

#### **Blinding**

DOI [to be added]



For all the in vivo animal studies (Figures 2, 7, 8, S4, S5, S9, S10, and S11), the samples were collected and analyzed by different investigators, ensuring that investigators who analyzed the data were blinded to the treatment groups.
