# Supplementary material for: Monocytes Reprogrammed by 4-PBA Potently Contribute to the Resolution of Inflammation and Atherosclerosis
Source: PubMed Central journal article supplement — Circ Res. 2024 Sep 3;135(8):856–72. doi: 10.1161/CIRCRESAHA.124.325023 (PMC11424066; doi:10.1161/circresaha.124.325023), 2024-09-03

# Full unedited membrane for Figure 3C

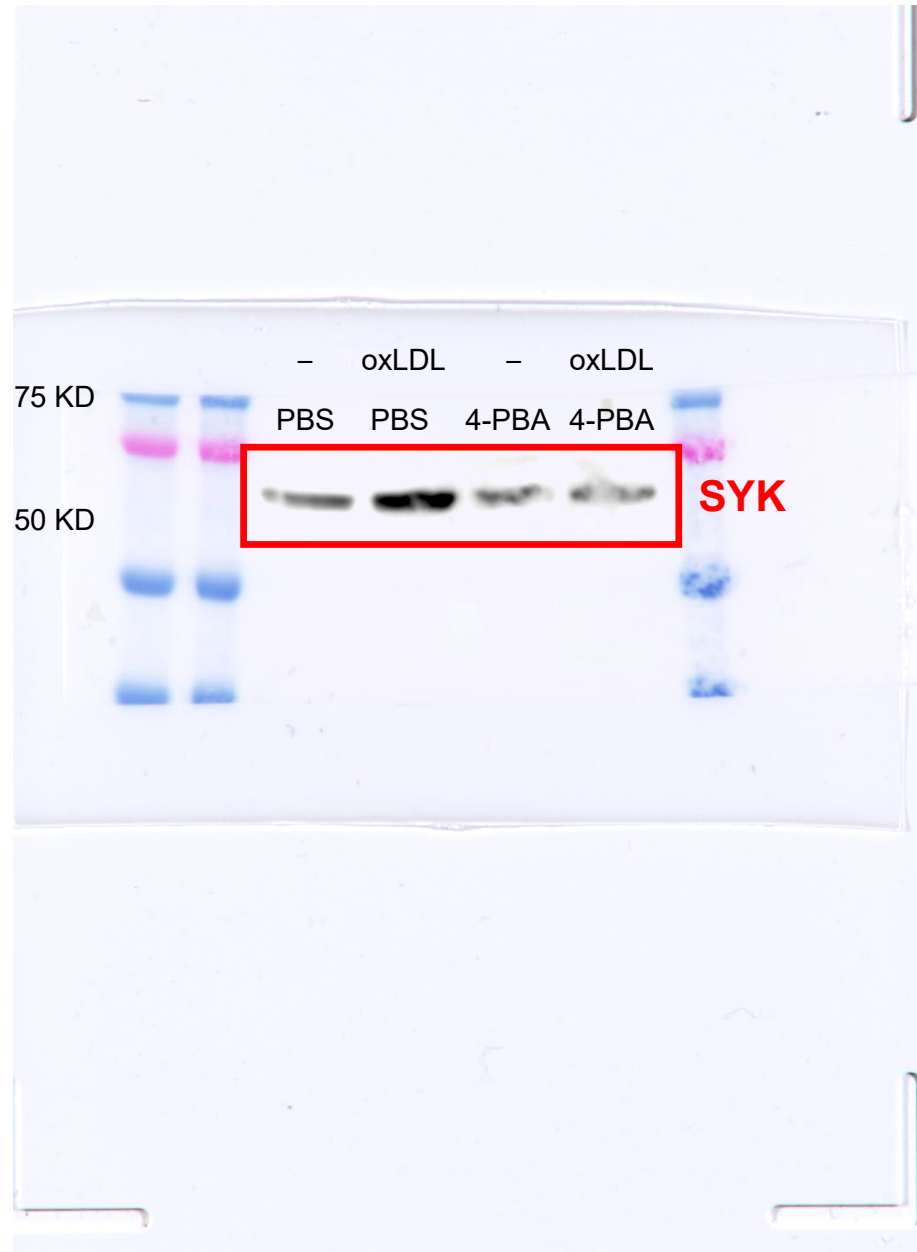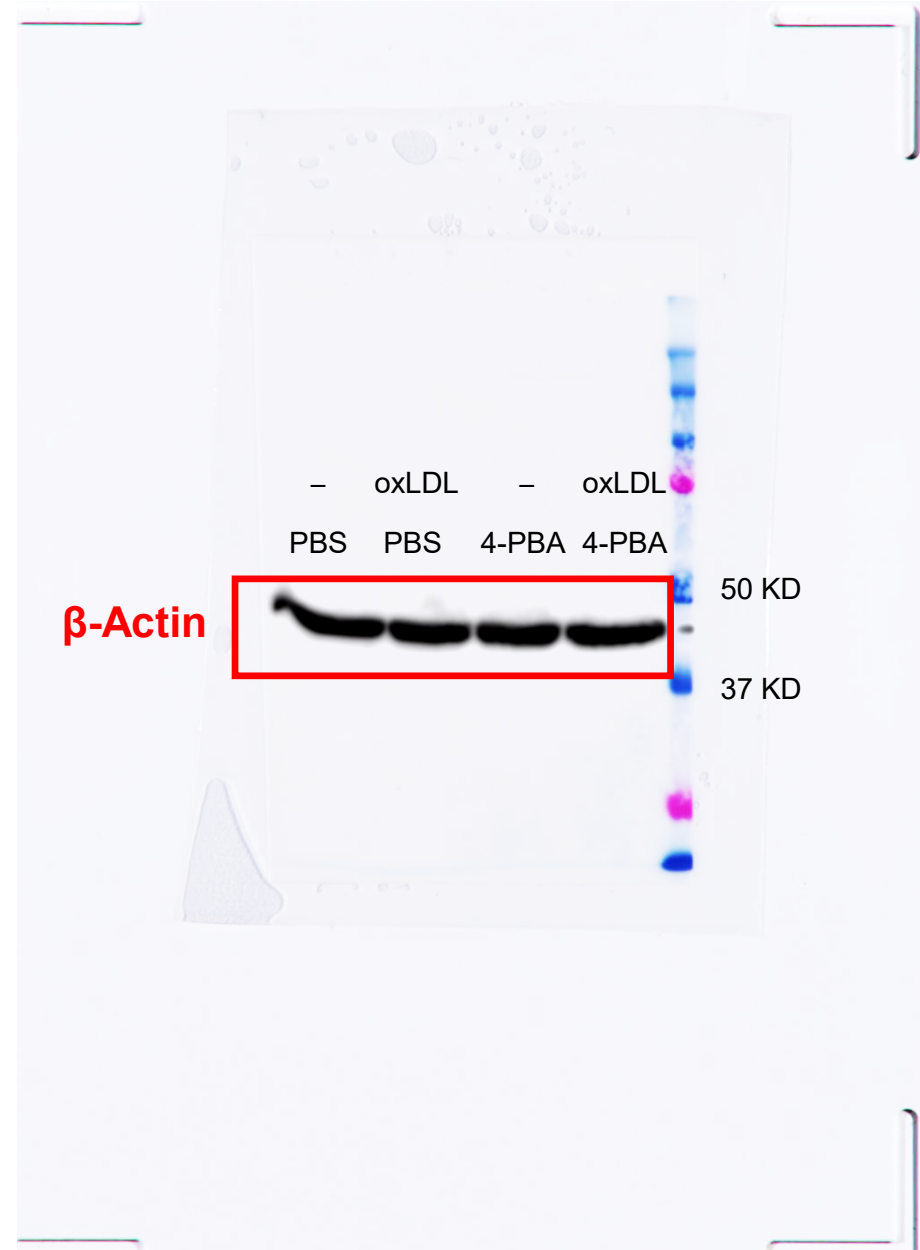

# Full unedited membrane for Figure 4B

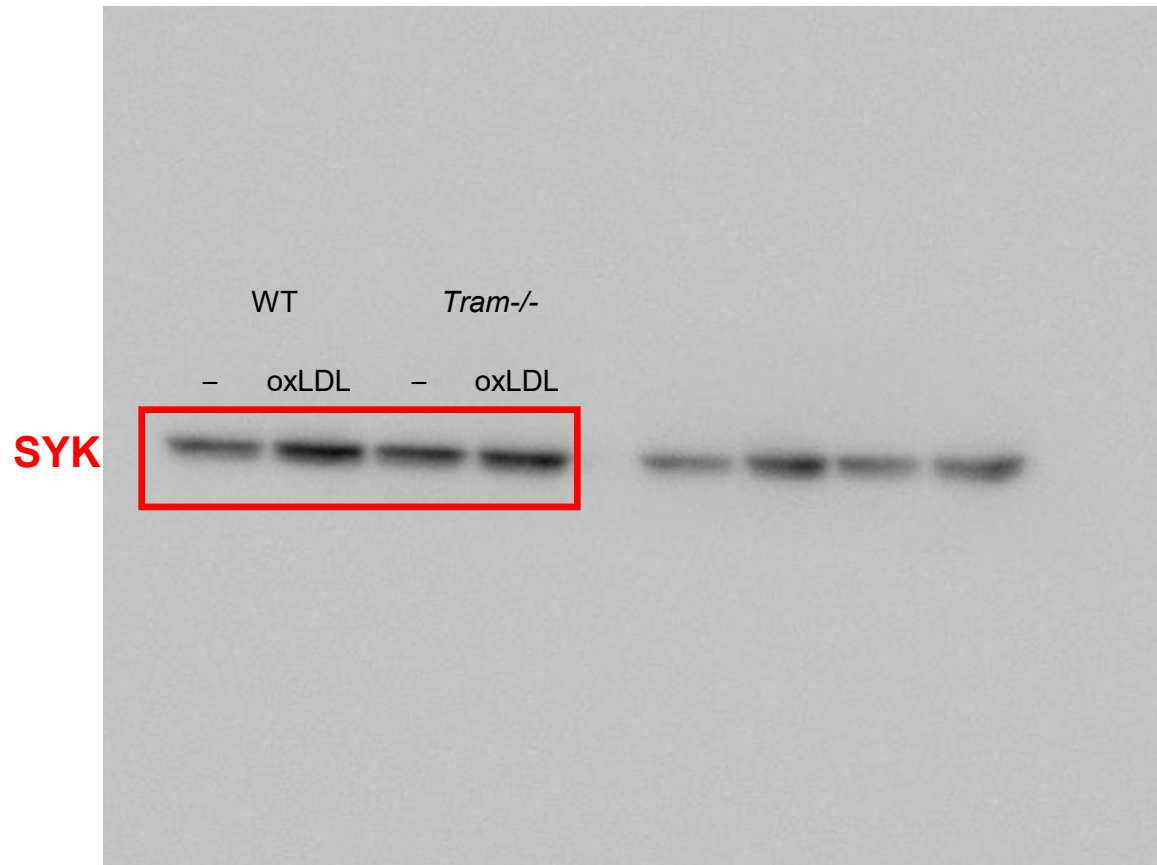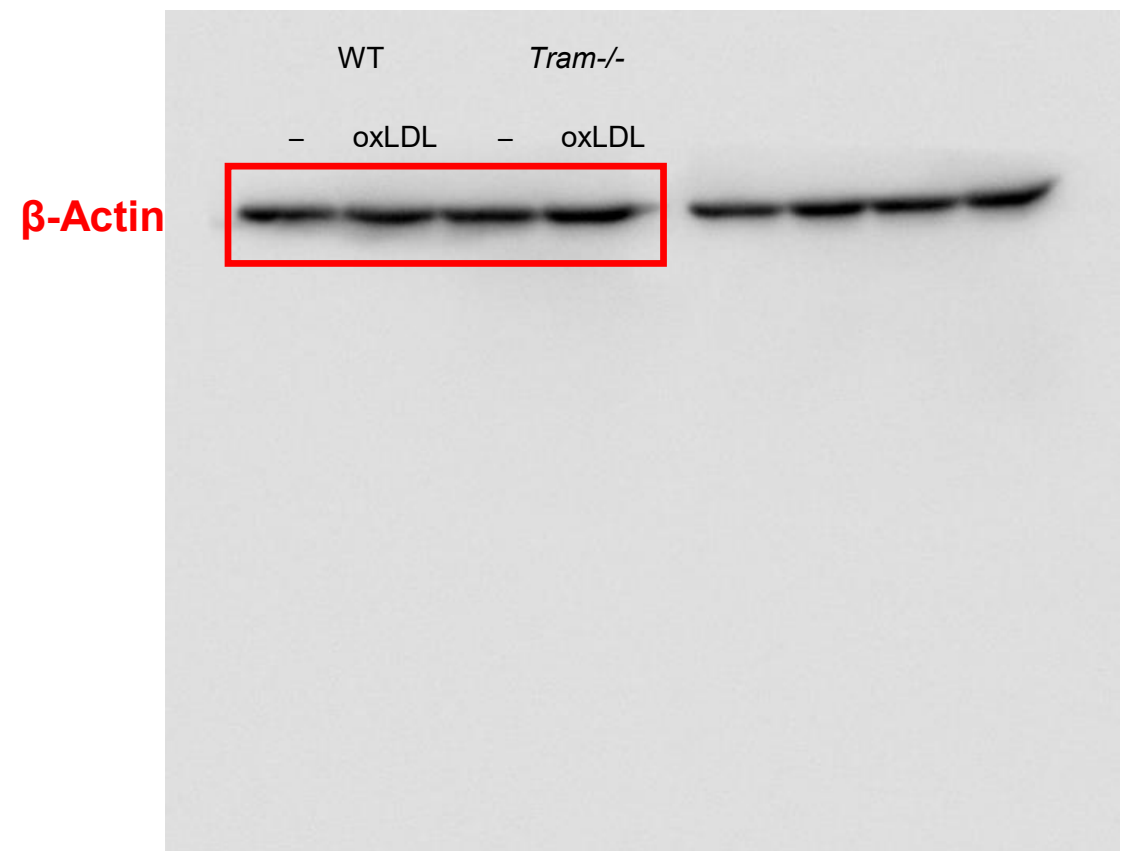

# Full unedited membrane for Figure 4C

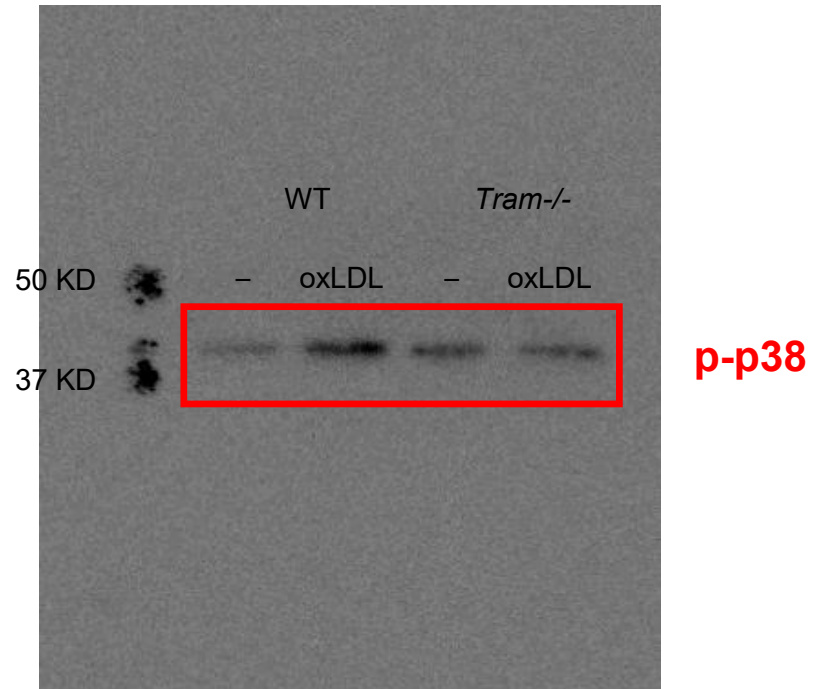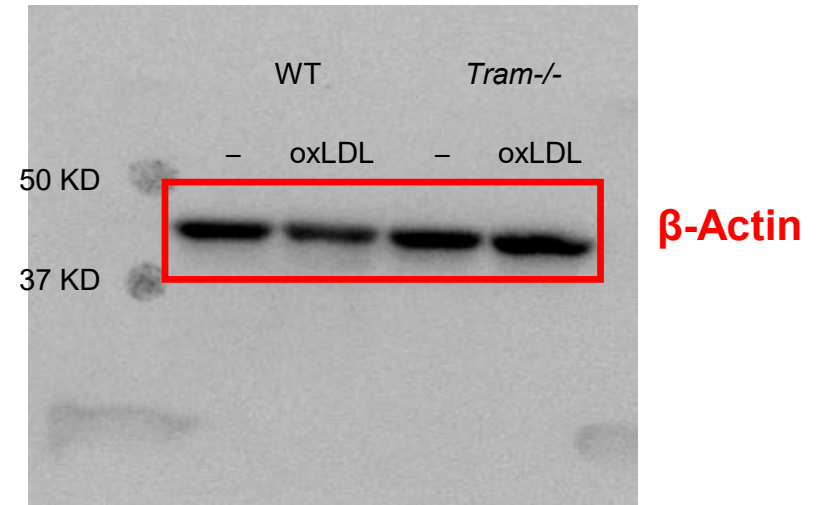

# Full unedited membrane for Figure 4E

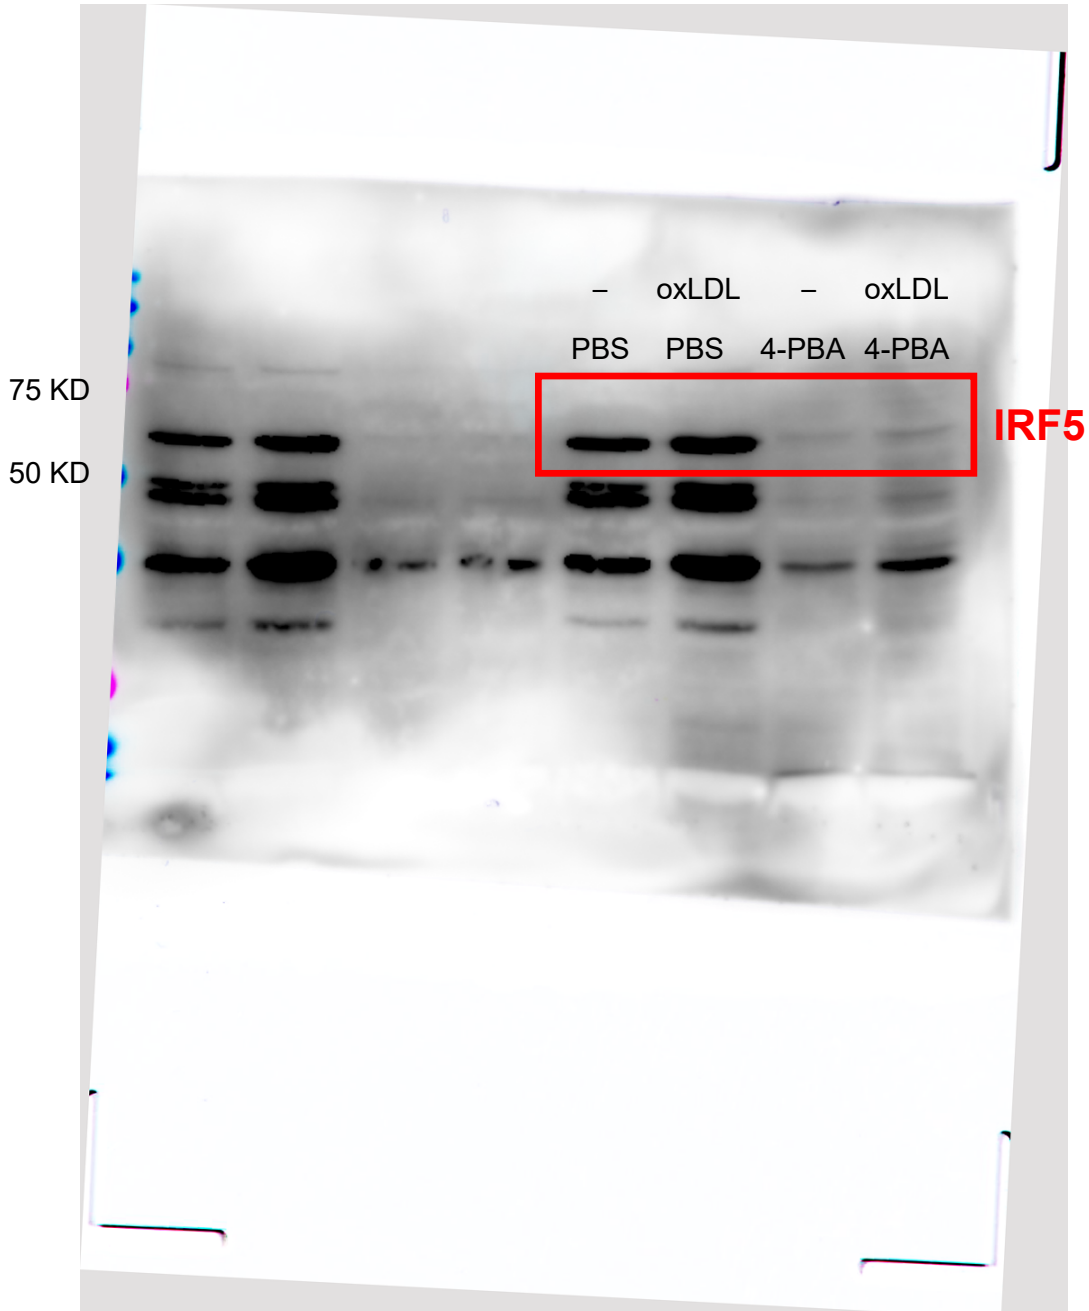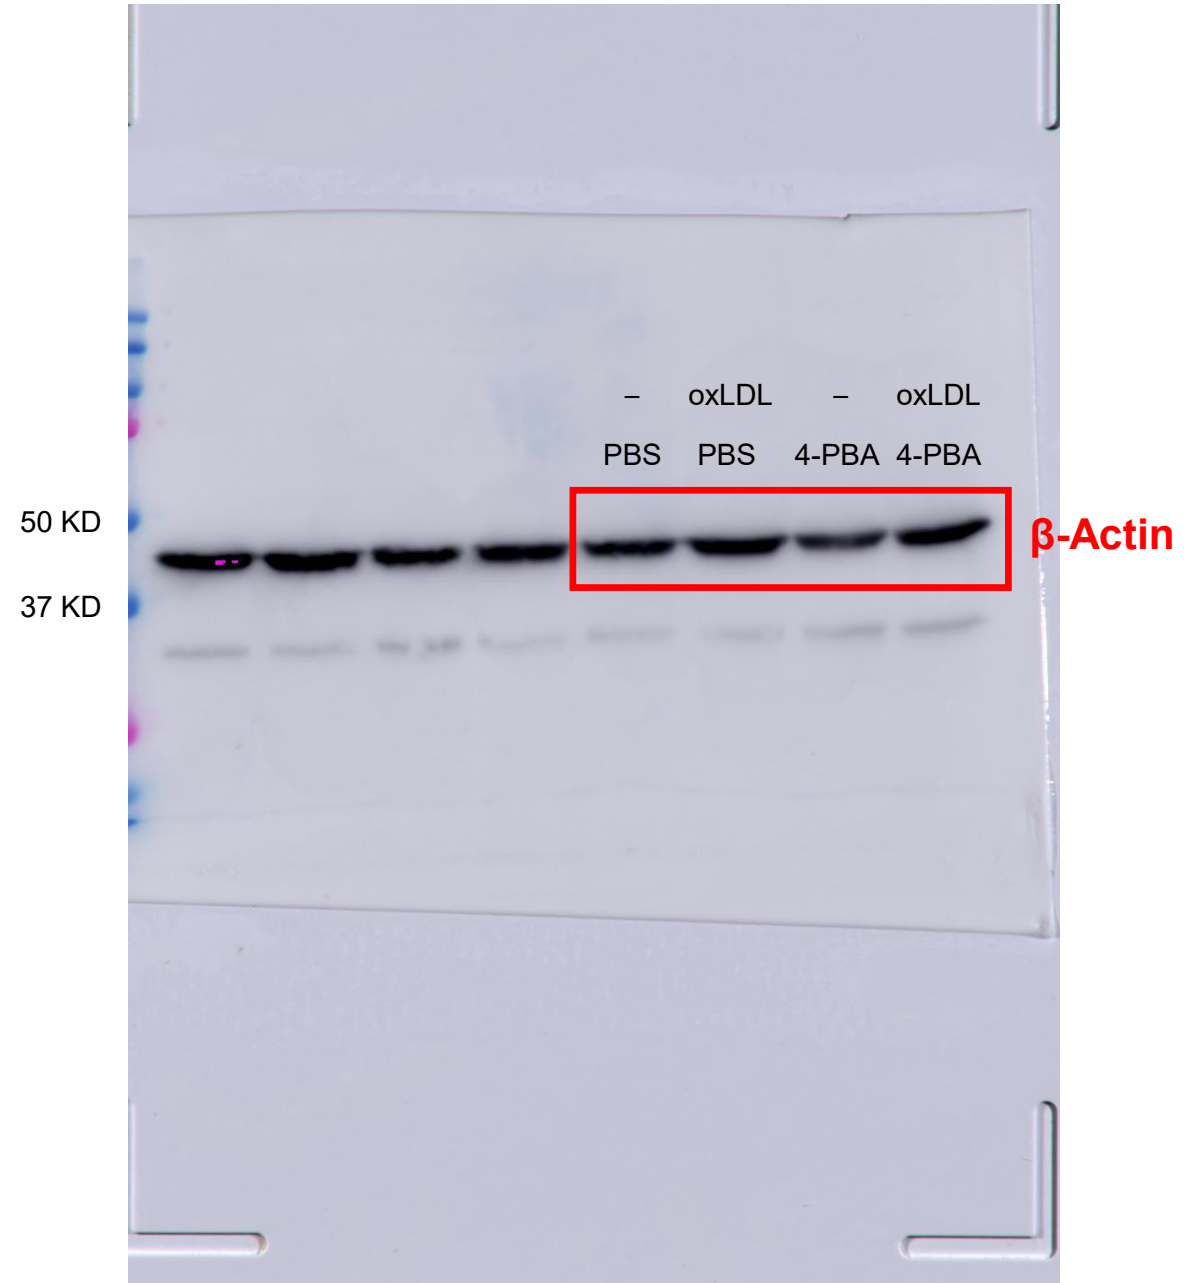

# Full unedited membrane for Figure 5A

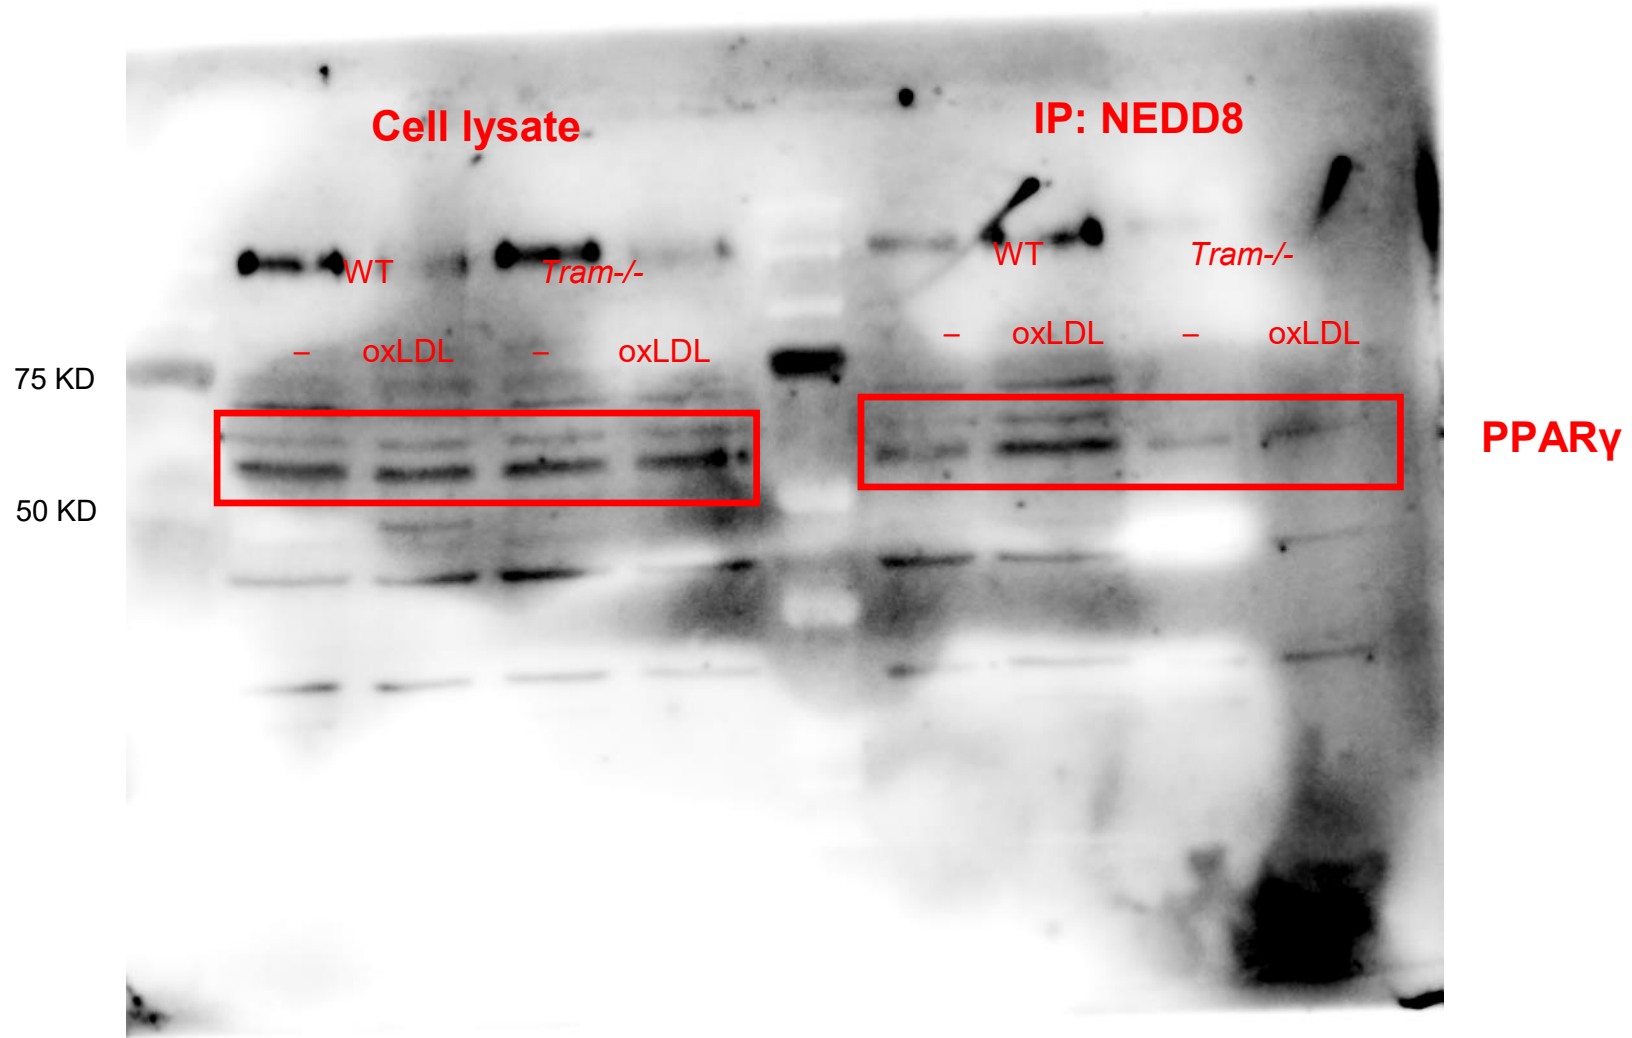

Supplement: res-135-856-s007.pdf [file res-135-856-s007.pdf]
